# Supplementary material for: Single-cell analysis by ICP-MS/MS as a fast tool for cellular bioavailability studies of arsenite
Source: Royal Society of Chemistry journal article supplement (doi:10.1039/c7mt00285h), 2017-12-13
Supplement: c7mt00285h1.pdf [file c7mt00285h1.pdf]

**Figure S1:** Chromatograms and histograms of cells incubated with 50  $\mu\text{M}$   $\text{iAs}^{\text{III}}$  for 24 h analyzed by SC-ICP-MS/MS. Displayed are the results obtained with a dwell time of 10 ms (A) and 3 ms (B). Cellular arsenic was calculated *via* external calibration.

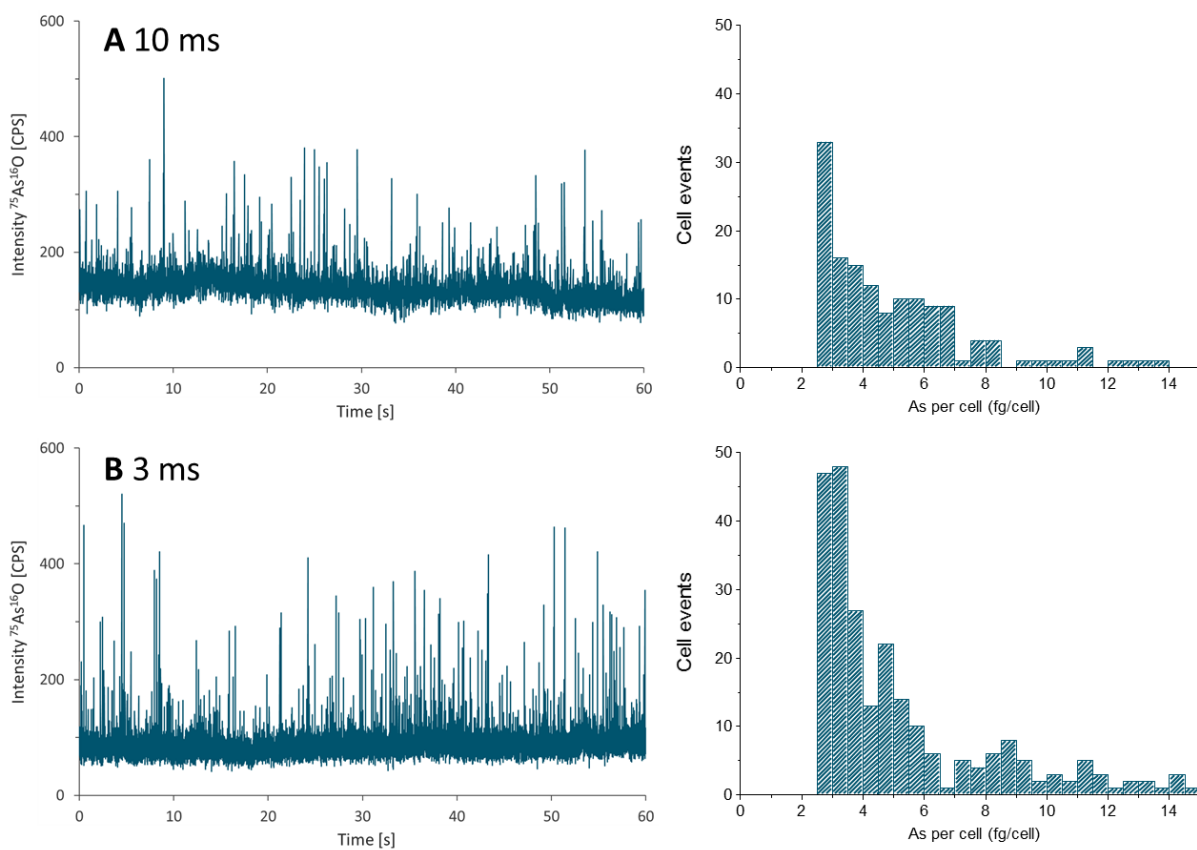

Figure S2: Chromatograms obtained by SC-ICP-MS/MS analysis of with 25  $\mu\text{M}$   $\text{iAs}^{\text{III}}$  incubated A549 cells for 0 (A), 2 (B), 6 (C), 16 (D), 24 (E), and 48 h (F).

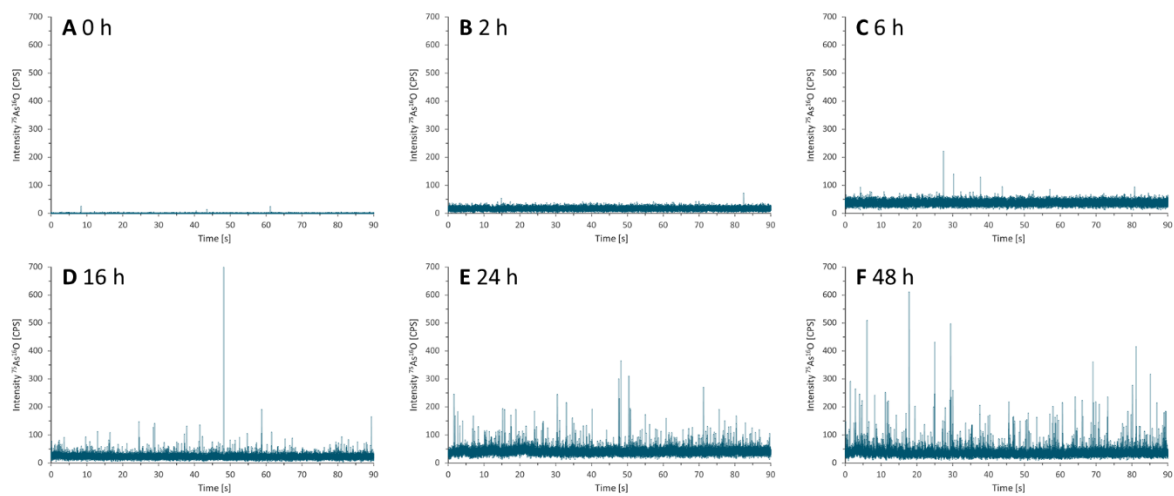

Table S1: ICP-MS/MS parameters.

| Operating Parameters for Agilent QQQ 8800 |                                                                                             |
|-------------------------------------------|---------------------------------------------------------------------------------------------|
| Nebulizer                                 | MicroMist 400 $\mu$ L (self-priming)                                                        |
| Spray chamber                             | Scott type                                                                                  |
| Plasma gas                                | 15 L/min                                                                                    |
| Carrier gas                               | 0.9 L/min                                                                                   |
| Make up gas                               | 1 L/min                                                                                     |
| Sample uptake rate                        | 0.166 mL/min                                                                                |
| Dwell time                                | 3 or 10 ms                                                                                  |
| Data acquisition mode                     | Time-resolved analysis (TRA)                                                                |
| Isotope Q1                                | $^{75}\text{As}$ , $^{32}\text{S}$ , $^{31}\text{P}$                                        |
| Reaction/collision gas                    | $\text{O}_2$ : 0.3 mL/min                                                                   |
| Isotope Q2                                | $^{75}\text{As}^{16}\text{O}$ , $^{32}\text{S}^{16}\text{O}$ , $^{31}\text{P}^{16}\text{O}$ |
